# Supplementary material for: Burden of tobacco in Nepal: a systematic analysis from the Global Burden of Disease Study 1990–2017
Source: PubMed Central journal article supplement — BMJ Open. 2021 Aug 23;11(8):e047847. doi: 10.1136/bmjopen-2020-047847 (PMC8383890; doi:10.1136/bmjopen-2020-047847), 2021-08-23
Supplement: bmjopen-2020-047847supp001.pdf [file bmjopen-2020-047847supp001.pdf]

**Supplementary Table 1. All-age deaths and DALYs for different diseases attributable to tobacco and their percentage change in Nepal, 1990-2017**

| Subcategory                         | All-Age Deaths, No. in Thousands (95% UI) |                              |           | All-Age DALYs, No. in Thousands (95% UI) |                                 |           |
|-------------------------------------|-------------------------------------------|------------------------------|-----------|------------------------------------------|---------------------------------|-----------|
|                                     | 1990                                      | 2017                         | change, % | 1990                                     | 2017                            | Change, % |
| <b>All causes</b>                   |                                           |                              |           |                                          |                                 |           |
| Tobacco                             |                                           |                              |           |                                          |                                 |           |
| Male                                | 11763.49 (9612.18-14237.80)               | 17372.20 (14056.39-20307.12) | 47.68     | 403665.07 (319794.17-512869.65)          | 446131.58 (364621.77-524648.21) | 10.52     |
| Female                              | 7608.83 (5827.14-9679.57)                 | 9553.55 (7463.66-12031.65)   | 25.56     | 280977.20 (205487.39-373383.63)          | 256300.53 (205568.71-316572.58) | -8.78     |
| Both                                | 19372.32 (16059.91-23310.44)              | 26925.75 (22826.17-31135.35) | 38.99     | 684642.27 (538331.13-875950.09)          | 702432.11 (593052.53-812425.42) | 2.60      |
| Smoking                             |                                           |                              |           |                                          |                                 |           |
| Male                                | 9858.89 (8016.19-12138.96)                | 15573.83 (12511.70-18320.09) | 57.97     | 280385.51 (227328.27-345198.66)          | 387323.13 (314734.78-458240.78) | 38.14     |
| Female                              | 5619.71 (4163.78-7373.09)                 | 7984.05 (6026.50-10280.06)   | 42.07     | 153618.50 (116802.49-200154.70)          | 201074.00 (155098.74-253269.80) | 30.89     |
| Both                                | 15478.60 (12838.83-18675.51)              | 23557.88 (19798.77-27400.07) | 52.20     | 434004.01 (360694.99-523145.50)          | 588397.13 (487193.19-690655.02) | 35.57     |
| Chewing tobacco                     |                                           |                              |           |                                          |                                 |           |
| Male                                | 324.53 (221.95-453.10)                    | 595.13 (412.87-782.12)       | 83.38     | 9802.97 (6587.60-13907.45)               | 15546.94 (10681.34-20552.20)    | 58.59     |
| Female                              | 142.83 (98.54-201.01)                     | 268.19 (194.01-356.27)       | 87.76     | 3558.17 (2385.54-5110.57)                | 6011.17 (4233.98-8176.42)       | 68.94     |
| Both                                | 467.36 (351.24-609.37)                    | 863.32 (664.09-1073.70)      | 84.72     | 13361.13 (9934.89-17759.87)              | 21558.11 (16005.69-27194.58)    | 61.35     |
| Secondhand smoking                  |                                           |                              |           |                                          |                                 |           |
| Male                                | 2023.02 (1223.08-3116.32)                 | 1966.04 (1388.69-2649.68)    | -2.82     | 125282.54 (64552.81-208075.08)           | 61759.15 (44109.97-84284.35)    | -50.70    |
| Female                              | 2133.57 (1257.73-3283.64)                 | 1717.76 (1179.09-2388.87)    | -19.49    | 130921.51 (68925.95-212905.05)           | 58748.28 (40421.33-80159.30)    | -55.13    |
| Both                                | 4156.59 (2503.94-6381.37)                 | 3683.80 (2641.33-4882.95)    | -11.37    | 256204.06 (133797.03-415607.64)          | 120507.43 (86416.83-162640.49)  | -52.96    |
| <b>Cardiovascular diseases</b>      |                                           |                              |           |                                          |                                 |           |
| Tobacco                             |                                           |                              |           |                                          |                                 |           |
| Male                                | 3791.45 (2966.34-4752.99)                 | 7184.91 (5484.11-8728.33)    | 89.50     | 106045.53 (82267.08-133672.18)           | 178781.72 (135047.16-220860.34) | 68.59     |
| Female                              | 1939.91 (1409.64-2638.17)                 | 2759.22 (2031.88-3598.37)    | 42.23     | 51596.75 (37925.85-69499.33)             | 68559.09 (51346.16-88568.29)    | 32.87     |
| Both                                | 5731.36 (4645.29-7010.77)                 | 9944.13 (7888.43-12157.90)   | 73.50     | 157642.28 (126776.05-193554.33)          | 247340.82 (194740.00-303138.58) | 56.90     |
| Smoking                             |                                           |                              |           |                                          |                                 |           |
| Male                                | 3453.41 (2688.03-4375.06)                 | 6398.37 (4808.50-7886.57)    | 85.28     | 96619.66 (74256.90-122738.75)            | 159276.84 (119281.99-198937.41) | 64.85     |
| Female                              | 1631.37 (1150.06-2269.44)                 | 2305.75 (1631.12-3096.08)    | 41.34     | 42772.31 (30386.44-59660.41)             | 56949.09 (41194.34-75687.19)    | 33.14     |
| Both                                | 5084.78 (4033.28-6349.49)                 | 8704.12 (6785.50-10755.96)   | 71.18     | 139391.98 (110502.77-173724.72)          | 216225.93 (167097.28-267200.96) | 55.12     |
| Secondhand smoking                  |                                           |                              |           |                                          |                                 |           |
| Male                                | 470.29 (335.36-642.16)                    | 1019.62 (716.19-1367.19)     | 116.81    | 13262.84 (9357.97-18103.45)              | 25748.76 (17829.80-34584.44)    | 94.14     |
| Female                              | 392.38 (279.69-543.01)                    | 552.72 (399.72-738.60)       | 40.86     | 11177.24 (7815.41-15454.67)              | 14258.69 (10012.59-19091.91)    | 27.57     |
| Both                                | 862.67 (645.37-1136.15)                   | 1572.35 (1155.62-2052.89)    | 82.27     | 24440.09 (18131.54-32553.33)             | 40007.45 (28671.94-52101.01)    | 63.70     |
| <b>Diabetes and kidney diseases</b> |                                           |                              |           |                                          |                                 |           |
| Tobacco                             |                                           |                              |           |                                          |                                 |           |
| Male                                | 89.86 (46.50-132.87)                      | 341.19 (212.30-499.97)       | 279.71    | 6537.41 (4043.63-9355.31)                | 16371.62 (10553.78-22939.55)    | 150.43    |
| Female                              | 83.46 (40.03-146.03)                      | 320.67 (180.70-493.02)       | 284.24    | 5137.20 (2824.43-7939.95)                | 13300.29 (7444.24-19447.89)     | 158.90    |
| Both                                | 173.31 (104.61-250.63)                    | 661.86 (423.10-933.46)       | 281.89    | 11674.62 (7240.42-16558.61)              | 29671.92 (18547.14-41567.02)    | 154.16    |
| Smoking                             |                                           |                              |           |                                          |                                 |           |
| Male                                | 60.05 (31.00-92.21)                       | 215.64 (125.04-325.16)       | 259.10    | 4392.28 (2637.49-6322.29)                | 10215.58 (6340.69-14596.02)     | 132.58    |
| Female                              | 38.47 (16.74-70.51)                       | 135.17 (71.15-222.16)        | 251.37    | 2188.41 (1197.36-3496.51)                | 5142.53 (2903.20-7975.01)       | 134.99    |
| Both                                | 98.52 (56.73-144.71)                      | 350.81 (205.70-514.87)       | 256.08    | 6580.70 (4055.51-9682.42)                | 15358.11 (9426.86-22203.75)     | 133.38    |

|                                  |                              |                              |        |                                 |                                 |        |  |
|----------------------------------|------------------------------|------------------------------|--------|---------------------------------|---------------------------------|--------|--|
| Secondhand smoking               |                              |                              |        |                                 |                                 |        |  |
| Male                             | 35.40 (12.48-60.40)          | 143.98 (52.67-241.44)        | 306.69 | 2525.21 (955.13-4178.18)        | 7028.35 (2625.10-11459.51)      | 178.33 |  |
| Female                           | 49.68 (16.07-97.51)          | 199.24 (74.84-338.96)        | 301.03 | 3218.62 (1162.47-5459.71)       | 8689.48 (3316.27-13987.41)      | 169.98 |  |
| Both                             | 85.08 (30.02-145.39)         | 343.22 (128.33-559.19)       | 303.39 | 5743.83 (2138.89-9608.90)       | 15717.82 (5916.86-24952.45)     | 173.65 |  |
| <b>All Neoplasms</b>             |                              |                              |        |                                 |                                 |        |  |
| Tobacco                          |                              |                              |        |                                 |                                 |        |  |
| Male                             | 1458.30 (1139.03-1890.08)    | 2795.38 (2190.73-3628.29)    | 91.69  | 38763.61 (30206.76-49414.72)    | 63597.51 (48418.72-82150.39)    | 64.06  |  |
| Female                           | 850.81 (606.63-1144.57)      | 1355.16 (979.14-1773.62)     | 59.28  | 22919.15 (16055.39-31167.33)    | 30615.38 (22087.11-40608.53)    | 33.58  |  |
| Both                             | 2309.11 (1829.24-2855.31)    | 4150.54 (3336.01-5024.85)    | 79.75  | 61682.77 (48392.88-76293.78)    | 94212.89 (74227.14-114859.20)   | 52.74  |  |
| Smoking                          |                              |                              |        |                                 |                                 |        |  |
| Male                             | 1250.10 (975.25-1649.62)     | 2401.44 (1848.26-3151.69)    | 92.10  | 32126.79 (24809.85-42129.01)    | 52760.17 (39959.53-69669.29)    | 64.22  |  |
| Female                           | 720.15 (488.16-1000.56)      | 1097.67 (750.55-1488.11)     | 52.42  | 19297.97 (12618.21-27388.48)    | 24084.51 (16609.46-32930.07)    | 24.80  |  |
| Both                             | 1970.25 (1545.76-2475.89)    | 3499.11 (2734.84-4290.12)    | 77.60  | 51424.76 (40202.22-65087.14)    | 76844.68 (59707.14-94791.62)    | 49.43  |  |
| Chewing tobacco                  |                              |                              |        |                                 |                                 |        |  |
| Male                             | 324.53 (221.95-453.10)       | 595.13 (412.87-782.12)       | 83.38  | 9802.97 (6587.60-13907.45)      | 15546.94 (10681.34-20552.20)    | 58.59  |  |
| Female                           | 142.83 (98.54-201.01)        | 268.19 (194.01-356.27)       | 87.76  | 3558.17 (2385.54-5110.57)       | 6011.17 (4233.98-8176.42)       | 68.94  |  |
| Both                             | 467.36 (351.24-609.37)       | 863.32 (664.09-1073.70)      | 84.72  | 13361.13 (9934.89-17759.87)     | 21558.11 (16005.69-27194.58)    | 61.35  |  |
| Secondhand smoking               |                              |                              |        |                                 |                                 |        |  |
| Male                             | 21.07 (8.88-41.47)           | 41.08 (18.62-77.70)          | 95.01  | 551.75 (228.76-1067.50)         | 939.60 (427.81-1780.49)         | 70.29  |  |
| Female                           | 34.30 (13.82-61.95)          | 71.29 (29.95-123.53)         | 107.84 | 1071.97 (442.54-1953.02)        | 2081.06 (870.79-3602.03)        | 94.13  |  |
| Both                             | 55.37 (28.26-90.91)          | 112.37 (57.13-183.26)        | 102.96 | 1623.73 (810.67-2684.85)        | 3020.66 (1546.52-4853.92)       | 86.03  |  |
| <b>Non-communicable diseases</b> |                              |                              |        |                                 |                                 |        |  |
| Tobacco                          |                              |                              |        |                                 |                                 |        |  |
| Male                             | 9084.74 (7213.20-11113.09)   | 15843.57 (12712.23-18568.33) | 74.40  | 258037.36 (208400.97-311823.54) | 399996.94 (325615.15-473155.30) | 55.02  |  |
| Female                           | 5405.68 (4000.45-7169.95)    | 8479.47 (6562.76-10786.52)   | 56.86  | 149766.37 (113912.16-195422.04) | 222238.88 (176225.32-276201.22) | 48.39  |  |
| Both                             | 14490.42 (12108.44-17315.76) | 24323.04 (20523.48-28032.74) | 67.86  | 407803.74 (341565.27-482686.51) | 622235.82 (521551.91-724024.44) | 52.58  |  |
| Smoking                          |                              |                              |        |                                 |                                 |        |  |
| Male                             | 8360.61 (6594.62-10279.50)   | 14278.19 (11397.99-16901.41) | 70.78  | 235498.35 (188051.06-288093.77) | 356411.43 (288822.06-421623.66) | 51.34  |  |
| Female                           | 4650.42 (3337.03-6281.82)    | 7178.97 (5429.79-9244.20)    | 54.37  | 125863.59 (93741.89-167530.95)  | 183252.98 (141279.02-232004.89) | 45.60  |  |
| Both                             | 13011.04 (10706.22-15734.95) | 21457.17 (17836.70-25205.32) | 64.92  | 361361.93 (297489.31-433996.59) | 539664.42 (445211.65-635293.86) | 49.34  |  |
| Chewing tobacco                  |                              |                              |        |                                 |                                 |        |  |
| Male                             | 324.53 (221.95-453.10)       | 595.13 (412.87-782.12)       | 83.38  | 9802.97 (6587.60-13907.45)      | 15546.94 (10681.34-20552.20)    | 58.59  |  |
| Female                           | 142.83 (98.54-201.01)        | 268.19 (194.01-356.27)       | 87.76  | 3558.17 (2385.54-5110.57)       | 6011.17 (4233.98-8176.42)       | 68.94  |  |
| Both                             | 467.36 (351.24-609.37)       | 863.32 (664.09-1073.70)      | 84.72  | 13361.13 (9934.89-17759.87)     | 21558.11 (16005.69-27194.58)    | 61.35  |  |
| Secondhand smoking               |                              |                              |        |                                 |                                 |        |  |
| Male                             | 826.51 (544.18-1157.79)      | 1707.58 (1204.09-2298.64)    | 106.60 | 24185.68 (16369.38-33055.50)    | 46057.83 (32953.64-60548.19)    | 90.43  |  |
| Female                           | 885.80 (562.91-1315.63)      | 1428.84 (955.94-2015.36)     | 61.31  | 27170.66 (17935.98-39583.53)    | 42147.61 (28847.28-57043.88)    | 55.12  |  |
| Both                             | 1712.31 (1160.43-2406.58)    | 3136.42 (2218.91-4183.96)    | 83.17  | 51356.35 (35980.77-71788.94)    | 88205.44 (62908.63-115112.33)   | 71.75  |  |
| <b>Tuberculosis</b>              |                              |                              |        |                                 |                                 |        |  |
| Tobacco                          |                              |                              |        |                                 |                                 |        |  |
| Male                             | 1065.82 (611.69-1723.30)     | 533.34 (298.43-827.30)       | -49.96 | 34317.44 (19894.39-54836.53)    | 15474.57 (8686.80-23623.93)     | -54.91 |  |
| Female                           | 667.34 (210.36-1288.01)      | 267.93 (114.47-461.56)       | -59.85 | 21064.12 (7035.82-39071.66)     | 7511.65 (3425.62-12761.83)      | -64.34 |  |

---

|         |                          |                         |        |                              |                              |        |
|---------|--------------------------|-------------------------|--------|------------------------------|------------------------------|--------|
| Both    | 1733.16 (962.41-2696.31) | 801.27 (445.52-1198.40) | -53.77 | 55381.56 (31368.85-84009.28) | 22986.22 (12814.67-33890.22) | -58.49 |
| Smoking |                          |                         |        |                              |                              |        |
| Male    | 1065.82 (611.69-1723.30) | 533.34 (298.43-827.30)  | -49.96 | 34317.44 (19894.39-54836.53) | 15474.57 (8686.80-23623.93)  | -54.91 |
| Female  | 667.34 (210.36-1288.01)  | 267.93 (114.47-461.56)  | -59.85 | 21064.12 (7035.82-39071.66)  | 7511.65 (3425.62-12761.83)   | -64.34 |
| Both    | 1733.16 (962.41-2696.31) | 801.27 (445.52-1198.40) | -53.77 | 55381.56 (31368.85-84009.28) | 22986.22 (12814.67-33890.22) | -58.49 |

---
